1 **Assessment of Awareness and Knowledge of Human Papillomavirus Transmission and**  
2 **Prevention Among Tertiary Institution Students in the Plateau Central Senatorial District,**  
3 **Nigeria**

4 **Authors: Juliana Rume<sup>1,2</sup>, Imran O. Morhason-Bello<sup>3</sup>, Adesina Oladokun<sup>3</sup>**

5 <sup>1</sup> Pan African University, Life and Earth Science Institute (including Health and Agriculture),  
6 University of Ibadan, Oyo State, Nigeria.

7 <sup>2</sup>College of Education Gindiri, Plateau State Nigeria.

8 <sup>3</sup>Obstetrics and Gynaecology Department, Faculty of Clinical Sciences, College of  
9 Medicine/University College Hospital, University of Ibadan, Oyo State, Nigeria.

10 \*Correspondence: Juliana Rume

11 Email: [juliarume@gmail.com](mailto:juliarume@gmail.com); [rume.juliana@paulesi.org.ng](mailto:rume.juliana@paulesi.org.ng)

12 **Abstract**

13 This cross-sectional study investigates awareness/knowledge about human papillomavirus (HPV)  
14 infection, transmission, prevention, and HPV vaccine among tertiary institution students in  
15 Plateau State, Nigeria. A cross-sectional study was conducted among students from two tertiary  
16 institutions in Plateau State, Nigeria. The study participants were selected using a multistage  
17 sampling technique. A well-designed questionnaire was used for data collection. Students'  
18 responses were analysed to assess their awareness and knowledge regarding HPV transmission,  
19 prevention, and vaccination. A composite score was obtained for general HPV knowledge. A  
20 score of more than 70.0% indicated good knowledge. The distribution of the variables was  
21 examined using frequency distribution and descriptive statistics. The chi-square test was  
22 performed for bivariate analysis. Logistics regression was performed to examine the odds of  
23 having good HPV knowledge among the students. Level of significant was set at 95%.

24 Of 425 students in this study, 302 (71.1%) were female and 123 (28.9%) were male. There was  
25 low awareness of HPV among students, with higher awareness among the females 66 (23.1%)  
26 than the males 26 (22.2%) ( $p = .853$ ). Both female 77 (26.1%) and male students 31 (26.72%)  
27 had low awareness of HPV vaccination. Among all participants, only 19 (5%) demonstrated  
28 good knowledge of HPV. Students who were employed significantly had good knowledge of  
29 HPV compared to those who were unemployed.

30 There is low awareness and general knowledge of HPV and its vaccination among tertiary  
31 institution students in Plateau State, Nigeria. The students' employment status is associated with  
32 their knowledge of HPV.

33  
34 **Keywords:** Human papillomavirus, HPV knowledge, HPV vaccine, HPV transmission, HPV  
35 prevention, Students.

## 36 **Introduction**

37 Human papillomavirus (HPV) is a non-enveloped, double-stranded, circular DNA virus that is  
38 responsible for causing multiple epithelial lesions and cancers in both genders. It can manifest as  
39 cutaneous and anogenital warts, which depending on the subtype, may progress to carcinoma[1,  
40 2]. HPV is predominantly transmitted through sexual contact, including vaginal, anal, and oral  
41 sex[3, 4]. Multiple health problems, such as genital warts, and cancers of the mouth/throat,  
42 cervix and anogenital sites are due to persistence of HPV infections [4]. Non-sexual skin contact  
43 and vertical transmission from mothers to babies during childbirth are other known modes of  
44 transmission[4, 5]. Generally, HPV infections are classified into high or low risk HPV depending  
45 on their oncogenic potentials. Anogenital and cutaneous warts are caused by low-risk HPVs (LR-  
46 HPVs), while anogenital (cervical, anal, vulvar, vaginal, and penile) cancers and oropharyngeal  
47 (tongue, tonsil, and throat) cancers are caused by high-risk HPVs (HR-HPVs) [6, 7]. Most  
48 sexually active men and women will be infected with HPV at some point in their life, and some  
49 may get it more than once[8].

50 HPV infection constitutes a major global public health concern due to its high prevalence,  
51 especially in women, where it is the main cause of cancer. Cervical HPV infection and related  
52 cancers have a varying geographic burden; they are primarily observed in low- and middle-  
53 income South American, African, and Asian countries. Previous studies indicated that Africa had  
54 the highest cervical HPV prevalence (21.1%), followed by Europe (14.2%), America (11.5%),  
55 and Asia (9.4%) among women with normal cervical cytology (NCC)[9-11].

56 Nigeria is the most populous country in Sub-Saharan Africa with estimated population of over  
57 200 million people[12]. Numerous studies have shown high prevalence of HPV ranging between  
58 16.1% to 68.8% among different population in Nigeria[13-17]. This prevalence is higher among

59 younger women, particularly those under 30 years of age, and gradually decreases as women age  
60 in Nigeria[14, 17]. There is relatively little information on awareness/knowledge of people on  
61 HPV and associated morbidities in North Central region of Nigeria relative to regions in the  
62 Southern Nigeria. Public health programs to enhance young adults' knowledge regarding HPV  
63 symptoms, causes, and prevention are also lacking. As a result, this study aims to explore  
64 awareness/knowledge of the transmission and prevention of HPV and HPV vaccine uptake  
65 among students in tertiary institutions in Plateau State. This study is very important for public  
66 health in Plateau State, Nigeria, because it has potential to influence policy and programs among  
67 young people in Northcentral region and their associated socio-cultural peculiarities.

## 68 **Materials and Methods**

### 69 **Study design**

70 This cross-sectional study was conducted among students in tertiary institutions in Plateau State  
71 to assess HPV awareness and knowledge on its transmission, prevention, and vaccination.

### 72 **Study setting**

73 Data were collected from students at two different tertiary institutions in the state: Plateau State  
74 University Bokkos (PLASU) and the Federal College of Education (FCE) Pankshin. PLASU is a  
75 degree-awarding institution, while FCE is a teacher-training institution that awards both a first  
76 degree in education and a Nigerian Certificate of Education (NCE). These institutions were  
77 selected because their location is central on the Plateau, connecting the northern and southern  
78 parts of the state.

### 79 **Inclusion criteria**

80 Students who have studied for at least one semester at each of the selected institutions, are  
81 between 18 and 30 years old, and signed the consent form to participate in the study.

## 82 **Exclusion criteria**

83 Students from the two selected tertiary institutions who are within the required age range of 18-  
84 30 years but did not consent to participate, as well as students who are either above or below the  
85 required age range, were excluded from the study.

## 86 **Sampling techniques**

87 A multistage sampling approach was used to select the study participants. In the first stage,  
88 PLASU and FCE were randomly selected from the list of tertiary institutions in Plateau State.  
89 Students from various faculties and departments within the selected institutions were  
90 subsequently contacted randomly.

## 91 **Sample size**

92 The required sample size was obtained using the cross-sectional study sample size formula:

$$n = \frac{Z_{\frac{\alpha}{2}}^2 p(1-p)}{d^2}$$

93 Where:

94 n is the sample size

95  $Z_{\frac{\alpha}{2}}$  is the level of confidence (95%) = 1.96

96 p is the proportion of participants with awareness of HPV from the previous study = 56.4% [18]

97 d is the precision of the study set at 5%.

98 The required sample size was calculated to be 379. To accommodate potential non-response  
99 biases, 12% was added to the estimated sample size, resulting in a total sample size of 425 used  
100 for the study.

### 101 **Participants recruitment and instrument for data collection**

102 Participants were recruited through banners, student social media groups, and the students' union  
103 government (SUG) officials. Data collection for the study was conducted at FCE between May  
104 4th and 6th, 2023, and at PLASU between May 22nd and 24th, 2023. A self-administered  
105 questionnaire was the primary data collection tool. The questionnaires were distributed to  
106 consenting students at the institutions. The questionnaires consisted of closed-ended questions to  
107 assess the HPV awareness, knowledge of transmission, preventive practices, and vaccination  
108 status of the study students. Before data collection, the questionnaire was pretested at another  
109 higher institution in Plateau State (College of Education Gindiri) to ensure clarity and  
110 appropriateness. Necessary adjustments were made based on the results of the pilot test.

### 111 **Informed Consent**

112 A written consent form was attached to the questionnaire which participants all read and those  
113 who are willing to participate signed prior to filling of the questionnaire. The Informed consent  
114 contained the study objectives, study procedure and assurance of confidentiality and the voluntary  
115 nature of their participation. Students were also assured that data obtained will be anonymized to  
116 protect their privacy.

### 117 **Data Management and Analysis**

118 Data collected were screened for completeness, coded, and analysed using STATA (StataCorp  
119 L.L.C.). Descriptive statistics and frequency distribution were obtained to assess the distribution  
120 of the variables. The chi-square statistical test was used to determine the association between the

121 socio-demographic characteristics of the students and their awareness and knowledge of HPV  
122 and its vaccination. Logistics regression was performed to examine the odds of having good  
123 HPV knowledge among the students. The missing data were included in the descriptive analyses  
124 but were excluded from the tests of associations and multivariable models. For bivariate analysis,  
125 a composite score was computed. The assessment of HPV knowledge involved questions  
126 covering the mode of transmission of HPV, whether HPV can cause cervical cancer, and methods  
127 of HPV infections prevention. Each correct answer was assigned a score of 1, while an incorrect  
128 answer received a score of 0. The total score was converted to a percentage and classified as  
129 follows: a score of less than or equal to 70.0% indicated a poor level of knowledge, while a score  
130 higher than 70% indicated a good level of knowledge. A p-value less than 0.05 was considered  
131 statistically significant.

### 132 **Ethical Consideration**

133 Ethics Committee (EC) of the Institute for Advanced Medical Research and Training (IAMRAT),  
134 College of Medicine, University College Hospital, University of Ibadan, Nigeria, gave ethical  
135 approval for this work, with reference number UI/EC/22/0028. Administrative clearance was  
136 obtained from the Plateau State Ministry of Health and the Plateau State Ministry for Higher  
137 Education. Father, permission was granted by FCE in Pankshin and PLASU in Bokkos, Plateau  
138 State, where the research data were collected.

### 139 **Results**

140 Among the 425 students selected from the two tertiary institutions, 302 (71.1%) were female,  
141 and 123 (28.9%) were male. Students from both institutions had an average age of 23 years. Of  
142 the total students, 45 (10.6%) were married, while the majority, 380 (89.4%), were single. More

143 than half, 289 (68.5%), of the students were unemployed, while 133 (31.5%) reported being  
 144 employed. (**Table 1**).

145

146 Table 1: Demographic characteristics of students by institutions

| <b>Variables</b>                     | <b>Total<br/>n (%)</b> | <b>PLASU<br/>n (%)</b> | <b>FCE<br/>n (%)</b> |
|--------------------------------------|------------------------|------------------------|----------------------|
| Age <sup>1</sup> [mean(sd)]          | 23.3 (2.8)             | 23.3 (3.1)             | 23.3 (2.5)           |
| <b>Gender</b>                        |                        |                        |                      |
| Female                               | 302 (71.1)             | 131 (73.2)             | 171 (69.5)           |
| Male                                 | 123 (28.9)             | 48 (26.8)              | 75 (30.5)            |
| <b>Educational Level<sup>2</sup></b> |                        |                        |                      |
| 100L                                 | 110 (26.0)             | 83 (46.9)              | 27 (11.0)            |
| 200L                                 | 93 (22.0)              | 34 (19.2)              | 59 (24.0)            |
| 300L                                 | 176 (41.6)             | 25 (14.1)              | 151 (61.4)           |
| 400L                                 | 34 (8.0)               | 34 (19.2)              | 0                    |
| Others                               | 10 (2.4)               | 1 (0.6)                | 9 (3.7)              |
| <b>Marital Status</b>                |                        |                        |                      |
| Married                              | 45 (10.6)              | 9 (5.0)                | 36 (14.6)            |
| Single                               | 380 (89.4)             | 170 (95.0)             | 210 (85.4)           |
| <b>Religion<sup>3</sup></b>          |                        |                        |                      |
| Christianity                         | 406 (96.7)             | 174 (98.3)             | 232 (95.5)           |
| Islam                                | 14 (3.3)               | 3 (1.7)                | 11 (4.5)             |
| <b>Employment<sup>4</sup></b>        |                        |                        |                      |
| Yes                                  | 133 (31.5)             | 64 (36.2)              | 69 (28.2)            |
| No                                   | 289 (68.5)             | 113 (63.8)             | 176 (71.8)           |

147 *1 – 32 missing, 2 – 2 missing, 3 – 5 missing, 4 – 3 missing*

148 Generally, there was low awareness of HPV among the students, with only 92 (22.8%) indicating  
 149 awareness. More female students 66 (23.1%) were aware of HPV compared to male students 26  
 150 (22.2%). University students 47 (27.2%) showed higher awareness of HPV than College of  
 151 Education students 45 (19.6%). There was no discernible difference in HPV awareness between  
 152 married and single students; however, employed students demonstrated more awareness of HPV  
 153 than those without a job. Only 108 (26.3%) students were aware of the HPV vaccine. Both

154 female 77 (26.10%) and male 31 (26.72%) students showed low awareness of HPV vaccination.  
 155 Similar to HPV awareness, employed students 41 (31.54%) were more aware of the HPV  
 156 vaccine than those unemployed 66 (23.74%). However, College of Education students 74  
 157 (31.49%) showed more awareness of the HPV vaccine than university students 34 (19.32%). The  
 158 type of institution ( $p = 0.006$ ) was significantly associated with awareness of HPV vaccine  
 159 (Table 2).

160 Table 2: Awareness of HPV and its vaccination by students' demographic characteristics

| Variables                | Awareness of HPV |            | p-value | Awareness of HPV vaccination |            | p-value |
|--------------------------|------------------|------------|---------|------------------------------|------------|---------|
|                          | Yes n (%)        | No n (%)   |         | Yes n (%)                    | No n (%)   |         |
| Age [mean(sd)]           | 23.8 (0.3)       | 23.1 (0.2) | .063    | 23.2 (0.2)                   | 23.3 (0.2) | .681    |
| <b>Gender</b>            |                  |            | .853    |                              |            | .897    |
| Female                   | 66 (23.1)        | 220 (76.9) |         | 77 (26.1)                    | 218 (73.9) |         |
| Male                     | 26 (22.2)        | 91 (77.8)  |         | 31 (26.7)                    | 85 (73.3)  |         |
| <b>Institution</b>       |                  |            | .072    |                              |            | .006    |
| PLASU                    | 47 (27.2)        | 126 (72.8) |         | 34 (19.3)                    | 142 (80.7) |         |
| FCE                      | 45 (19.6)        | 185 (80.4) |         | 74 (31.5)                    | 161 (68.5) |         |
| <b>Educational Level</b> |                  |            | .05     |                              |            | .396    |
| 100L                     | 26 (24.8)        | 79 (75.2)  |         | 24 (21.8)                    | 86 (78.2)  |         |
| 200L                     | 19 (21.1)        | 71 (78.9)  |         | 28 (31.8)                    | 60 (68.2)  |         |
| 300L                     | 32 (19.6)        | 131 (80.4) |         | 48 (28.6)                    | 120 (71.4) |         |
| 400L                     | 14 (42.4)        | 19 (57.6)  |         | 6 (18.3)                     | 27 (81.8)  |         |
| Others                   | 1 (10.0)         | 9 (90.0)   |         | 2 (20.0)                     | 8 (80.0)   |         |
| <b>Marital Status</b>    |                  |            | .986    |                              |            | .254    |
| Married                  | 10 (22.7)        | 34 (77.3)  |         | 15 (33.3)                    | 30 (66.7)  |         |
| Single                   | 82 (22.8)        | 277 (77.2) |         | 93 (25.4)                    | 273 (74.6) |         |
| <b>Religion</b>          |                  |            | .221    |                              |            | .615    |
| Christianity             | 86 (22.2)        | 301 (77.8) |         | 103 (26.1)                   | 291 (73.9) |         |
| Islam                    | 4 (36.4)         | 7 (63.6)   |         | 3 (25.0)                     | 9 (75.0)   |         |
| <b>Employment</b>        |                  |            | .648    |                              |            | .095    |
| Yes                      | 31 (24.4)        | 96 (75.6)  |         | 41 (31.5)                    | 89 (68.5)  |         |
| No                       | 61 (22.3)        | 212 (77.7) |         | 66 (23.7)                    | 212 (76.3) |         |

161  
 162 The students were categorized into two groups based on their composite score reflecting their  
 163 general knowledge of HPV. Among all students, only 19 (5%) demonstrated good knowledge of



164 HPV. There was no notable difference in the percentage of females (5.1%) and males (4.7%)  
 165 exhibiting good knowledge of HPV. A slightly higher percentage of students from the University  
 166 (6.1%) exhibited a good understanding of HPV compared to students from the College of  
 167 Education (4.2%). Employed students showed a higher level of knowledge of HPV compared to  
 168 unemployed students. Employment status was found to be significantly associated with students'  
 169 knowledge of HPV ( $p = .047$ ) (Table 3).

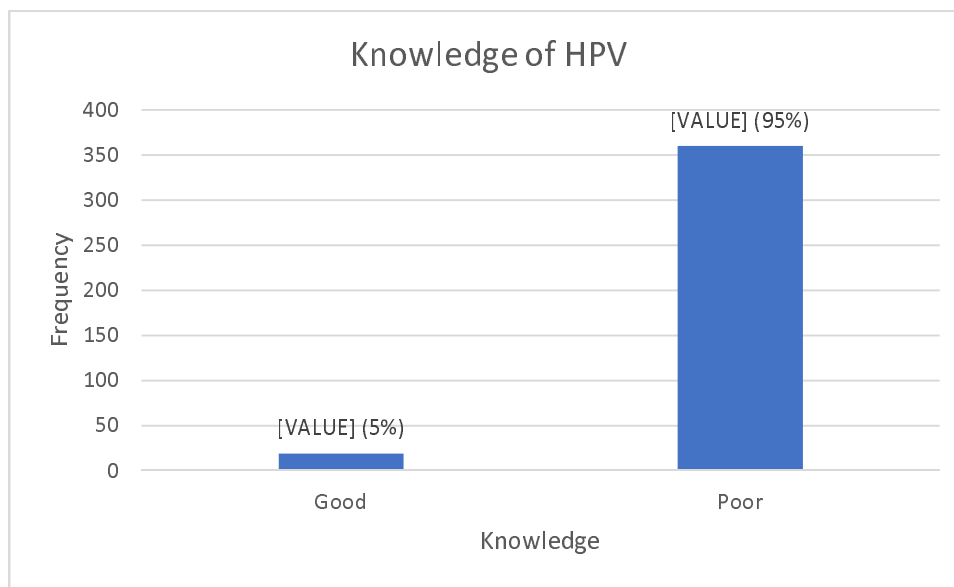

170  
 171 Figure 1: Students general knowledge of HPV

172 Table 3: General Knowledge of HPV by students' demographic characteristics

| Variables                | General Knowledge of HPV |               | p-value |
|--------------------------|--------------------------|---------------|---------|
|                          | Poor<br>n (%)            | Good<br>n (%) |         |
| Age [mean(sd)]           | 23.2 (0.2)               | 23.9 (0.6)    | .238    |
| <b>Gender</b>            |                          |               | .869    |
| Female                   | 259 (94.9)               | 14 (5.1)      |         |
| Male                     | 101 (95.3)               | 5 (4.7)       |         |
| <b>Institution</b>       |                          |               | .412    |
| PLASU                    | 155 (93.9)               | 10 (6.1)      |         |
| FCE                      | 205 (95.8)               | 9 (4.2)       |         |
| <b>Educational Level</b> |                          |               | .309    |
| 100L                     | 93 (92.1)                | 8 (7.9)       |         |

|                       |            |          |      |
|-----------------------|------------|----------|------|
| 200L                  | 77 (97.5)  | 2 (2.5)  |      |
| 300L                  | 149 (96.1) | 6 (3.9)  |      |
| 400L                  | 30 (90.9)  | 3 (9.1)  |      |
| Others                | 9 (100)    | 0        |      |
| <b>Marital Status</b> |            |          | .383 |
| Married               | 39 (97.5)  | 1 (2.5)  |      |
| Single                | 321 (94.7) | 18 (5.3) |      |
| <b>Religion</b>       |            |          | .362 |
| Christianity          | 348 (95.3) | 17 (4.7) |      |
| Islam                 | 8 (88.9)   | 1 (11.1) |      |
| <b>Employment</b>     |            |          | .047 |
| Yes                   | 111 (91.7) | 10 (8.3) |      |
| No                    | 246 (96.5) | 9 (3.5)  |      |

173 The results of both crude and adjusted odds ratios of having good knowledge of HPV were  
174 presented in **Tables 4**. When adjusted for other variables, each one-year increase in age was  
175 associated with a 21% increase in the odds of having good knowledge of HPV (AOR = 1.21,  
176 95% CI: 1.00 – 1.47). The odds of having good knowledge of HPV were lower among male  
177 students (AOR = 0.75, 95% CI: 0.22 – 2.55) compared to female students. Federal College of  
178 Education students had 1.74 times higher odds (AOR = 1.74, 95% CI: 0.49 – 6.16) of having  
179 good knowledge of HPV than University students. Furthermore, students who were employed  
180 significantly had good knowledge of HPV compared to those who were unemployed (AOR =  
181 0.32, 95% CI: 0.11 – 0.88).

182 Table 4: Logistic regression analysis of factors associated with good HPV knowledge

| <b>Variables</b>         | <b>Crude OR (95% CI)</b> | <b>p-value</b> | <b>Adjusted OR (95% CI)</b> | <b>p-value</b> |
|--------------------------|--------------------------|----------------|-----------------------------|----------------|
| <b>Age</b>               | 1.09 (0.93 – 1.29)       | .285           | 1.21 (1.00 – 1.47)          | .05            |
| <b>Gender</b>            |                          | .869           |                             | .650           |
| Female                   | 1                        |                | 1                           |                |
| Male                     | 0.92 (0.32 – 2.61)       |                | 0.75 (0.22 – 2.55)          |                |
| <b>Institution</b>       |                          | .414           |                             | .389           |
| PLASU                    | 1                        |                | 1                           |                |
| FCE                      | 0.68 (0.27 – 1.72)       |                | 1.74 (0.49 – 6.16)          |                |
| <b>Educational level</b> |                          | .267           |                             | .104           |

|                       |                     |      |                     |      |
|-----------------------|---------------------|------|---------------------|------|
| 100L                  | 1                   |      | 1                   |      |
| 200L                  | 0.30 (0.06 – 1.46)  |      | 0.18 (0.03 – 1.00)  |      |
| 300L                  | 0.47 (0.16 – 1.39)  |      | 0.20 (0.05 – 0.84)  |      |
| 400L                  | 1.16 (0.29 – 4.66)  |      | 0.58 (0.11 – 3.00)  |      |
| Others                | 1                   |      | 1                   |      |
| <b>Marital status</b> |                     | .452 |                     | .328 |
| Married               | 1                   |      | 1                   |      |
| Single                | 2.19 (0.28 – 16.83) |      | 3.11 (0.32 – 30.21) |      |
| <b>Religion</b>       |                     | .388 |                     | .257 |
| Christian             | 1                   |      | 1                   |      |
| Islam                 | 2.56 (0.30 – 21.64) |      | 3.77 (0.38 – 37.37) |      |
| <b>Employment</b>     |                     | .057 |                     | .027 |
| Yes                   | 1                   |      | 1                   |      |
| No                    | 0.41 (0.16 – 1.03)  |      | 0.32 (0.11 – 0.88)  |      |

## 183 Discussion

184 This study found that there is low awareness of HPV and its vaccination among tertiary  
 185 institution students in Plateau State, Nigeria. Students' knowledge of HPV was considerably low  
 186 in the study. Approximately 5% of students in tertiary institutions had good knowledge of HPV;  
 187 22.8% had ever heard of HPV; 13.9% were aware that HPV causes cervical cancer; and 26.3%  
 188 knew HPV has a vaccine. The students' employment status was found to be associated with good  
 189 knowledge of HPV.

190 The low awareness/knowledge of HPV in this study are similar to the findings from a study by  
 191 Makwe et al. conducted in Lagos and a study in Kano, where it was found that only 17.7% and  
 192 3.7% of female participants, respectively, had good awareness and knowledge of HPV [18, 19].  
 193 Given that every student had finished secondary school education, the similarity of our study's  
 194 findings to those of Makwe et al. was unexpected. The lack of state-sponsored health education  
 195 initiatives about HPV and vaccination may be the cause of the low level of awareness of HPV,  
 196 which is believed to be a problem in the majority of developing countries. However, further

197 analysis revealed a significant association between educational level and HPV awareness. This  
198 association aligns with findings from studies conducted in developed countries, which also  
199 reported a relationship between increased levels of education and HPV awareness[20-22].

200 The prevention of HPV infections is essential for the control of HPV-related cancers. The  
201 students had extremely low levels of awareness of the HPV vaccine. Only 8.01% of students  
202 have gotten the HPV vaccine, indicating that low awareness of the vaccine and its importance  
203 has a detrimental effect on vaccine uptake. Compared to previous studies done in Benin City,  
204 Nigeria[23], there is a higher level of awareness about the HPV vaccine in Plateau state. In  
205 contrast to our study, the findings of other studies conducted in Ethiopia (31.4%)[24],  
206 Switzerland (70.7%)[25], and China (69.2%)[26] among students, showed more awareness about  
207 the HPV vaccine. Furthermore, the vaccine uptake is significantly lower than the HPV vaccine  
208 uptake recorded in developed countries like Germany (67.0%)[22]. The observed variation can  
209 be explained by differences in geographical location, government policies, healthcare activities,  
210 awareness campaigns, and socioeconomic factors. Lack of accessibility to the vaccine is another  
211 issue lowering HPV vaccination rates.

212 Although both genders had low scores on general knowledge of HPV, the scores were relatively  
213 lower among male students than female students. This suggests that tertiary institution students,  
214 particularly male students, may not be fully aware of HPV. This can be explained by the fact that  
215 HPV infection is primarily associated with cervical cancer in females, and the HPV vaccine is  
216 not available for males in Nigeria. Enhancing the knowledge of male students regarding HPV  
217 infection, related illnesses, and the advantages of vaccination is important.

218 Assessing the general knowledge of HPV among the students, we observed significant  
219 differences in the perceptions of HPV transmission and preventive techniques, particularly  
220 between genders. Most students agreed on certain modes of transmission such as unprotected  
221 intercourse and blood transfusions, but discrepancies were found in other methods. For instance,  
222 only 48% of female students and 60% of male students acknowledged French kissing as a  
223 potential mode of transmission. Furthermore, regarding preventive techniques, the study found a  
224 notable difference between both genders. For example, compared to males (76.8%), a higher  
225 percentage of female students (84.3%) considered protection during sex to be an effective  
226 preventive approach. Conversely, the majority of students, regardless of gender, recognized the  
227 importance of remaining faithful in a relationship as a preventive measure. The cultural norms  
228 surrounding health talks and specialized health efforts that focus on women's health issues may  
229 have influenced female students, who demonstrated a remarkable knowledge of HPV preventive  
230 techniques.

231 This study has the following limitations: Self-report bias and recall bias may have been present  
232 in the study because we relied on self-reported data that was gathered through self-administered  
233 questionnaires. Second, because the study was cross-sectional, it is not possible to establish  
234 strong causal relationships; hence, care should be taken when interpreting the influences.

235 In conclusion, this study highlights the inadequate awareness and knowledge of HPV, its  
236 transmission, and preventive measures among students in Plateau State tertiary institutions.  
237 Targeted educational programs focusing on diverse educational levels and institution types are  
238 recommended to enhance HPV knowledge and promote vaccine uptake. Addressing these gaps is  
239 crucial to reducing HPV-related health risks and advancing public health efforts in the state.

240 **Competing interest:** The authors declare no competing interest in the research.

241 **Acknowledgment:**

242 I would like to acknowledge that the data in this manuscript are part of the corresponding  
243 author's doctoral dissertation. I also wish to acknowledge the support of Bello Yusuf, Veronica  
244 Rume Nwankpa, Justin Clement Tangshak, and the Pan African University Life and Earth  
245 Science Institute (including Health and Agriculture) University of Ibadan.

246

247 **Authors' contributions:**

248 Juliana Rume: Conceived and wrote the draft.

249 Imran O. Morhason-Bello: Revised the manuscript for important intellectual content, statistical  
250 analysis, and valuable impute.

251 Adesina Oladokun: Proofread and approve the manuscript for submission.

252

253

254

255

256

257

258

259

260

261

262

263

264

265

266

267

268

269

270

271

272

273

274

275

276  
277  
278  
279  
280  
281  
282  
283  
284  
285

286 **Reference**

- 287 1. Luria L, Cardoza-Favarato G, Doerr C. Human Papillomavirus (Nursing): StatPearls  
288 Publishing, Treasure Island (FL); 2023 2023.
- 289 2. Houlihan CF, de Sanjosé S, Baisley K, Changalucha J, Ross DA, Kapiga S, et al.  
290 Prevalence of human papillomavirus in adolescent girls before reported sexual debut. The  
291 Journal of infectious diseases. 2014;210(6):837-45.
- 292 3. Herbenick D, Patterson C, Beckmeyer J, Gonzalez YRR, Luetke M, Guerra-Reyes L, et  
293 al. Diverse sexual behaviors in undergraduate students: Findings from a campus probability  
294 survey. The journal of sexual medicine. 2021;18(6):1024-41.
- 295 4. Czeglédy J. Sexual and non-sexual transmission of human papillomavirus (a short  
296 review). Acta Microbiologica et Immunologica Hungarica. 2001;48(3-4):511-7.
- 297 5. Park H, Lee SW, Lee IH, Ryu HM, Cho AR, Kang YS, et al. Rate of vertical transmission  
298 of human papillomavirus from mothers to infants: relationship between infection rate and mode  
299 of delivery. Virology journal. 2012;9(1):1-7.
- 300 6. Forman D, de Martel C, Lacey CJ, Soerjomataram I, Lortet-Tieulent J, Bruni L, et al.  
301 Global burden of human papillomavirus and related diseases. Vaccine. 2012;30:F12-F23.

- 302 7. Asiaf A, Ahmad ST, Mohammad SO, Zargar MA. Review of the current knowledge on  
303 the epidemiology, pathogenesis, and prevention of human papillomavirus infection. *European*  
304 *Journal of Cancer Prevention*. 2014;23(3):206-24.
- 305 8. Chesson HW, Dunne EF, Hariri S, Markowitz LE. The estimated lifetime probability of  
306 acquiring human papillomavirus in the United States. *Sexually transmitted diseases*.  
307 2014;41(11):660.
- 308 9. Bruni L, Barrionuevo-Rosas L, Albero G, Serrano B, Mena M, Gómez D, et al. Human  
309 papillomavirus and related diseases report. *ICO/IARC Information Centre on HPV and Cancer*.  
310 2019:307-.
- 311 10. De Sanjosé S, Diaz M, Castellsagué X, Clifford G, Bruni L, Muñoz N, et al. Worldwide  
312 prevalence and genotype distribution of cervical human papillomavirus DNA in women with  
313 normal cytology: a meta-analysis. *The Lancet infectious diseases*. 2007;7(7):453-9.
- 314 11. Bruni L, Diaz M, Castellsagué M, Ferrer E, Bosch FX, de Sanjosé S. Cervical human  
315 papillomavirus prevalence in 5 continents: meta-analysis of 1 million women with normal  
316 cytological findings. *Journal of Infectious Diseases*. 2010;202(12):1789-99.
- 317 12. Population, total - Nigeria [Internet]. [cited 2024]. Available from:  
318 <https://data.worldbank.org/indicator/SP.POP.TOTL?locations=NG>.
- 319 13. Thomas J, Herrero R, Omigbodun A, Ojemakinde K, Ajayi I, Fawole A, et al. Prevalence  
320 of papillomavirus infection in women in Ibadan, Nigeria: a population-based study. *British*  
321 *journal of cancer*. 2004;90(3):638-45.
- 322 14. Morhason-Bello IO, Baisley K, Pavon MA, Adewole IF, Bakare R, de Sanjosé S, et al.  
323 Prevalence and genotype specific concordance of oro-genital and anal human papillomavirus  
324 infections among sexually active Nigerian women. *Infectious agents and cancer*. 2021;16:1-20.



- 325 15. Morhason-Bello IO, Baisley K, Pavon MA, Adewole IF, Bakare RA, de Sanjosé S, et al.  
326 Oral, genital and anal human papillomavirus infections among female sex workers in Ibadan,  
327 Nigeria. *Plos one*. 2022;17(3):e0265269.
- 328 16. Ezechi O, Akinsolu F, Salako A, Abodunrin O, Adewole I, Olagunju M, et al. High-risk  
329 human papillomavirus infection among Nigerian women: A systematic review and meta-analysis.  
330 *Journal of International Medical Research*. 2023;51(7):03000605231182884.
- 331 17. Akarolo-Anthony SN, Famooto AO, Dareng EO, Olaniyan OB, Offiong R, Wheeler CM,  
332 et al. Age-specific prevalence of human papilloma virus infection among Nigerian women. *BMC*  
333 *public health*. 2014;14(1):1-7.
- 334 18. Makwe CC, Anorlu RI, Odeyemi KA. Human papillomavirus (HPV) infection and  
335 vaccines: knowledge, attitude and perception among female students at the University of Lagos,  
336 Lagos, Nigeria. *Journal of epidemiology and global health*. 2012;2(4):199-206.
- 337 19. Rabiu I, Yahuza Z. Knowledge and attitude towards human papilloma virus infection,  
338 vaccines, and cervical cancer prevention among school students in Kano, Nigeria. *Advances in*  
339 *Virology*. 2023;2023.
- 340 20. Radecki Breitkopf C, Finney Rutten LJ, Findley V, Jacobson DJ, Wilson PM, Albertie M,  
341 et al. Awareness and knowledge of Human Papillomavirus (HPV), HPV-related cancers, and  
342 HPV vaccines in an uninsured adult clinic population. *Cancer Medicine*. 2016;5(11):3346-52.
- 343 21. McBride KR, Singh S. Predictors of adults' knowledge and awareness of HPV, HPV-  
344 associated cancers, and the HPV vaccine: implications for health education. *Health Education &*  
345 *Behavior*. 2018;45(1):68-76.
- 346 22. Blödt S, Holmberg C, Müller-Nordhorn J, Rieckmann N. Human Papillomavirus  
347 awareness, knowledge and vaccine acceptance: A survey among 18-25 year old male and female

348 vocational school students in Berlin, Germany. *The European Journal of Public Health*.  
349 2012;22(6):808-13.

350 23. Ezeanochie M, Olasimbo P. Awareness and uptake of human papilloma virus vaccines  
351 among female secondary school students in Benin City, Nigeria. *African health sciences*.  
352 2020;20(1):45-50.

353 24. Biyazin T, Yilma A, Yetwale A, Fenta B, Dagnaw Y. Knowledge and attitude about  
354 human papillomavirus vaccine among female high school students at Jimma town, Ethiopia.  
355 *Human Vaccines and Immunotherapeutics*. 2022;18(1):2036522.

356 25. Schwendener CL, Kiener LM, Jafflin K, Rouached S, Juillerat A, Meier V, et al. HPV  
357 vaccine awareness, knowledge and information sources among youth in Switzerland: a mixed  
358 methods study. *BMJ open*. 2022;12(1):e054419.

359 26. Chen G, Wu B, Dai X, Zhang M, Liu Y, Huang H, et al. Gender differences in knowledge  
360 and attitude towards HPV and HPV vaccine among college students in Wenzhou, China.  
361 *Vaccines*. 2021;10(1):10.

362

363
